# Supplementary material for: Preparation and Characterization of a Novel Mucoadhesive Carvedilol Nanosponge: A Promising Platform for Buccal Anti-Hypertensive Delivery
Source: MDPI journal article supplement (doi:10.3390/gels8040235), 2022-04-11
Supplement: s1 [file s1]

## Supplementary Materials

**Table S1.** Kinetic analysis of release data of carvedilol from different bilosomal formulations and aqueous CRV suspension.

| Formulation code      | Correlation Coefficient (R <sup>2</sup> ) |             |               |
|-----------------------|-------------------------------------------|-------------|---------------|
|                       | Zero-order                                | First-order | Higuchi model |
| BL1                   | 0.8326                                    | 0.9302      | 0.9457        |
| BL2                   | 0.8362                                    | 0.9148      | 0.9472        |
| BL3                   | 0.8791                                    | 0.9378      | 0.9583        |
| BL4                   | 0.9526                                    | 0.9512      | 0.9653        |
| BL5                   | 0.8727                                    | 0.9593      | 0.9667        |
| BL6                   | 0.8533                                    | 0.9553      | 0.9605        |
| BL7                   | 0.8481                                    | 0.9283      | 0.9558        |
| BL8                   | 0.8064                                    | 0.9194      | 0.9294        |
| BL9                   | 0.7774                                    | 0.9047      | 0.9184        |
| Carvedilol suspension | 0.9428                                    | 0.9879      | 0.9772        |

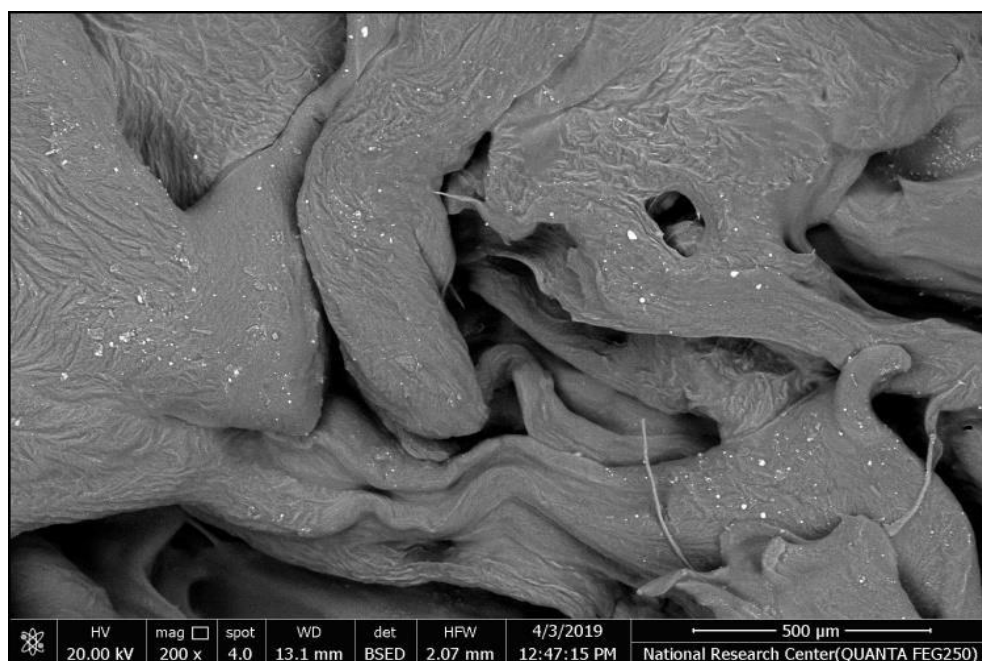

**Figure S1.** Transmission electron image of CRV nanosponge.

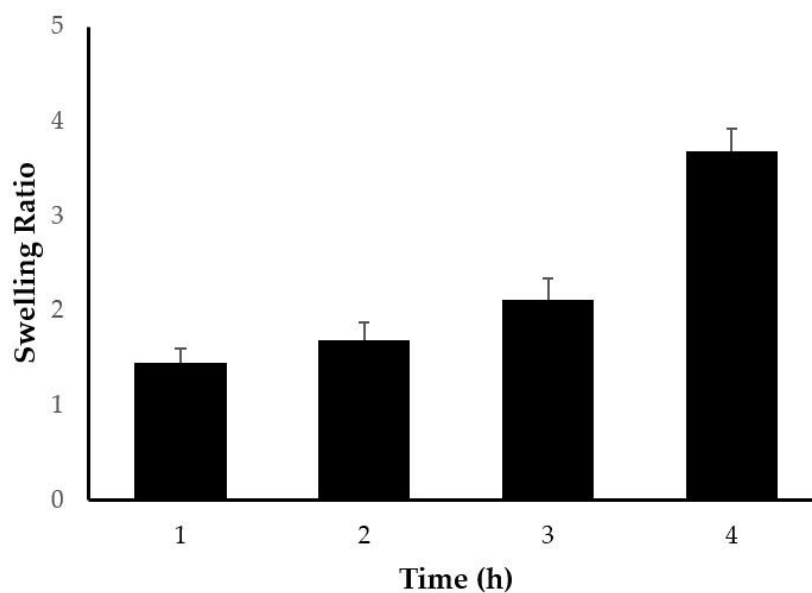

**Figure S2.** Swelling of CRV nanosponge.

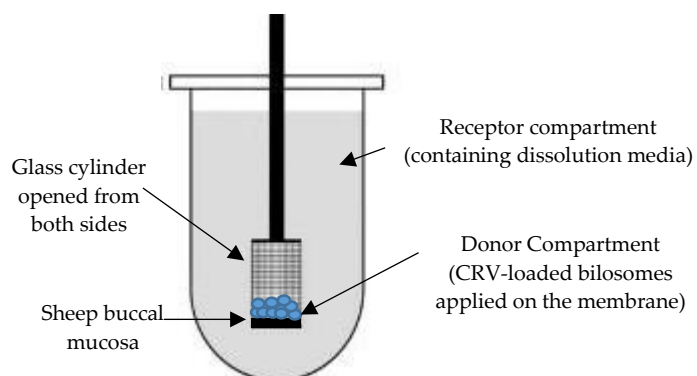

**Figure S3.** Cartoon depicting the apparatus utilized in *ex-vivo* permeation study of the optimized CRV-loaded bilosomes from Sheep buccal mucosa.

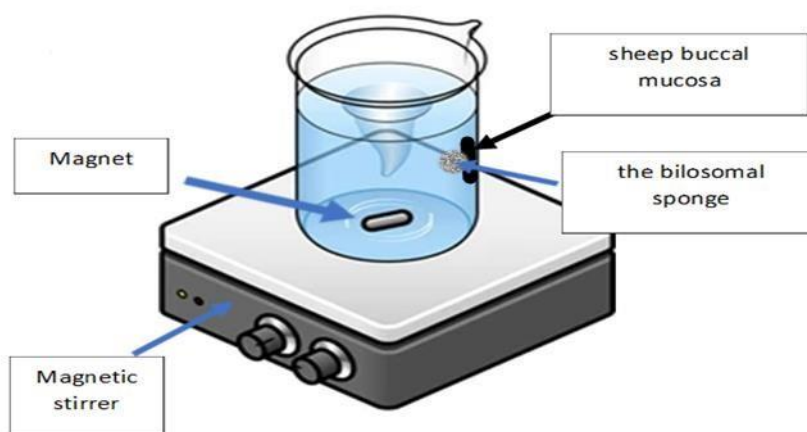

**Figure S4.** Cartoon depicting the apparatus utilized in measuring the *ex-vivo* mucoadhesion time of the formulated CRV nanosponge.
